# Supplementary material
Source: publisher figshare collection journal article supplement (https://frontiersin.figshare.com/ndownloader/files/15564317)
Supplement: Supplementary file 1 [file 15564317]

# Supplementary Material: Nighttime cooling of an urban pond

## 1 SUPPLEMENTARY TABLES AND FIGURES

### 1.1 Figures

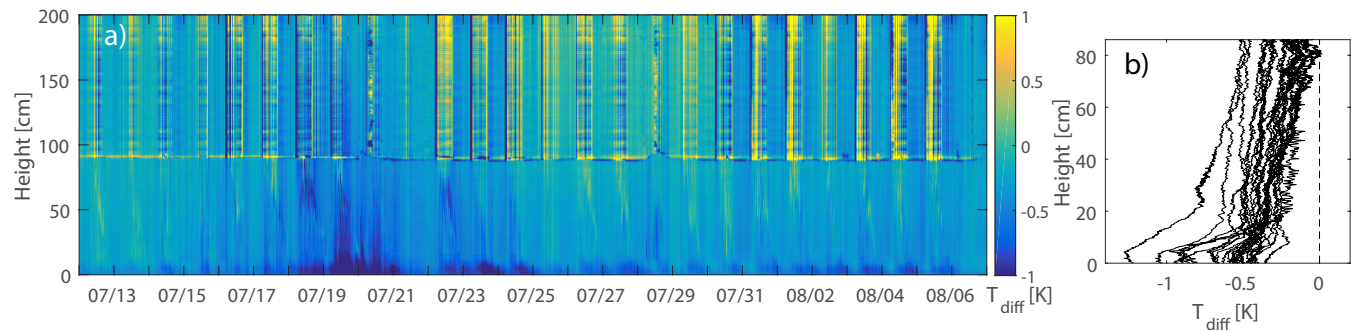

Figure S1: Temperature difference ( $T_{right} - T_{left}$ ) between the two measurement columns shown in Figure 1. Subplot a) shows instantaneous temperature differences for the whole 2 m profile, subplot b) shows the average water temperature difference between the two columns for each night of the measurement period.
